# Supplementary material for: Investigation of 11p15.5 Methylation Defects Associated with Beckwith-Wiedemann Spectrum and Embryonic Tumor Risk in Lateralized Overgrowth Patients
Source: MDPI journal article supplement (doi:10.3390/cancers15061872), 2023-03-21
Supplement: s1 [file s1]

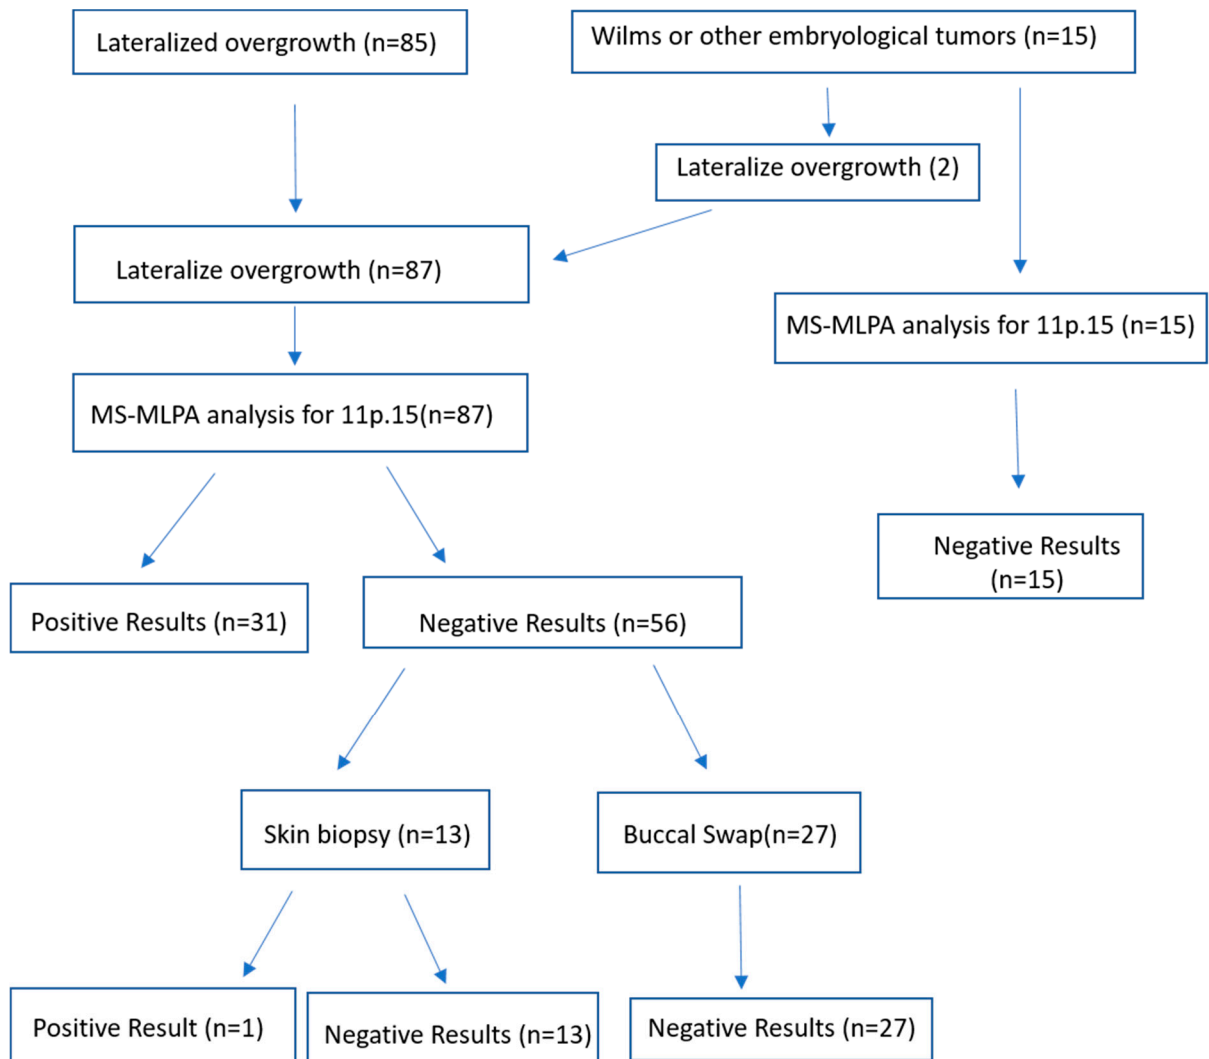

**Figure S1.** The diagnostic algorithms of the patients included in this study. MS-MLPA:  
Abbreviation: MS-MLPA: Methylation-specific multiplex ligation-dependent probe amplification

**Table S1.** The cardinal and suggestive findings and scoring of all patients according to the BWS consensus, and molecular results

| Patient number | Diagnosis age /Gender | Cardinal and supportive features designated by the BWS consensus (Brioude et al., 2018) |                                              |              |             |                                                      |                 |                               |                           |                                  |                |              |                      |                    |                        |    | Score      | BWS clinical spectrum | MS-MLPA for 11p15.5 region |                     |
|----------------|-----------------------|-----------------------------------------------------------------------------------------|----------------------------------------------|--------------|-------------|------------------------------------------------------|-----------------|-------------------------------|---------------------------|----------------------------------|----------------|--------------|----------------------|--------------------|------------------------|----|------------|-----------------------|----------------------------|---------------------|
|                |                       | Cardinal features (2 point)                                                             |                                              |              |             |                                                      |                 | Supportive features (1 point) |                           |                                  |                |              |                      |                    |                        |    |            |                       |                            |                     |
|                |                       | Pathologic                                                                              | Multifocal/bilateral WT or nephroblastomatos | Macroglossia | Omphalocele | Lateralized overgrowth (severe or mild/localization) | Hyperinsulinism | Typical BWSp tumours          | Birth weight greater>2SDS | Umbilical hernia/diastasis recti | Ear crease/pit | Organomegaly | Facial nevus simplex | Polyhydramnios and | Transient hypoglycemia |    |            |                       | blood sample               | Skin/ buccal sample |
| 1              | 7 mo/M                | -                                                                                       | -                                            | -            | -           | Severe/ right lower limb                             | -               | -                             | -                         | +                                | -              | -            | -                    | -                  | -                      | 3  | ILO        | pUPD11                | -                          |                     |
| 2              | 5 yr/M                | -                                                                                       | -                                            | -            | -           | Severe/ contralateral                                | -               | -                             | -                         | -                                | -              | -            | -                    | -                  | -                      | 2  | ILO        | pUPD11                | -                          |                     |
| 3              | 10 mo/F               | -                                                                                       | -                                            | -            | -           | Severe/ right lower limb                             | -               | -                             | -                         | -                                | -              | -            | +                    | -                  | -                      | 3  | ILO        | IC2-LoM               | -                          |                     |
| 4              | 11 yr/F               | -                                                                                       | -                                            | +            | +           | Severe/ right upper and lower limb                   | -               | -                             | +                         | +                                | +              | -            | -                    | -                  | -                      | 9  | Class ical | pUPD11                | -                          |                     |
| 5              | 3 yr/M                | -                                                                                       | -                                            | +            | -           | Mild/ left upper and lower limb                      | -               | -                             | -                         | +                                | +              | +            | -                    | -                  | -                      | 7  | Class ical | IC2-LoM               | -                          |                     |
| 6              | 8 mo/M                | -                                                                                       | -                                            | +            | -           | Mild/ left lower limb                                | -               | -                             | +                         | +                                | +              | +            | +                    | -                  | +                      | 10 | Class ical | pUPD11                | -                          |                     |
| 7              | 5 yr/M                | -                                                                                       | -                                            | -            | -           | Severe/ right upper and lower limb)                  | -               | -                             | -                         | -                                | -              | -            | -                    | -                  | -                      | 2  | ILO        | IC2-LoM               | -                          |                     |
| 8              | 3 mo/F                | -                                                                                       | -                                            | +            | -           | Mild/ right upper and lower limb                     | -               | -                             | -                         | +                                | +              | -            | +                    | -                  | -                      | 7  | Class ical | IC2-LoM               | -                          |                     |
| 9              | 7 mo/M                | -                                                                                       | -                                            | -            | -           | Severe/ left lower limb                              | -               | -                             | -                         | -                                | -              | -            | -                    | -                  | -                      | 2  | ILO        | pUPD11                | -                          |                     |
| 10             | 4 yr/M                | -                                                                                       | -                                            | -            | -           | Mild/ right upper and lower limb                     | -               | -                             | -                         | -                                | -              | -            | -                    | -                  | -                      | 2  | ILO        | Borderlin e pUPD11    | -                          |                     |
| 11             | 6 mo/M                | -                                                                                       | -                                            | -            | -           | Severe/ right upper and lower limb                   | -               | -                             | -                         | +                                | +              | +            | -                    | -                  | -                      | 5  | Atypi cal  | TEST (-)              | IC2- LOM                   |                     |
| 12             | 9 yr/F                | -                                                                                       | -                                            | -            | -           | Severe/right lower limb                              | -               | -                             | -                         | -                                | -              | -            | -                    | -                  | -                      | 2  | ILO        | TEST (-)              | TEST (-)                   |                     |
| 13             | 3 mo/M                | -                                                                                       | -                                            | -            | -           | Severe/ right upper and lower limb                   | -               | -                             | -                         | -                                | -              | -            | -                    | -                  | -                      | 2  | ILO        | TEST (-)              | TEST (-)                   |                     |
| 14             | 8 yr/M                | -                                                                                       | -                                            | -            | -           | Severe/ left lower limb                              | -               | -                             | -                         | -                                | -              | -            | -                    | -                  | -                      | 2  | ILO        | TEST (-)              | TEST (-)                   |                     |
| 15             | 6 mo/F                | -                                                                                       | -                                            | -            | -           | Mild/ right upper and lower limb                     | -               | -                             | -                         | -                                | -              | -            | +                    | -                  | -                      | 3  | ILO        | TEST (-)              | TEST (-)                   |                     |
| 16             | 6 mo/M                | -                                                                                       | -                                            | -            | -           | Mild/ right upper and lower lim)                     | -               | -                             | -                         | -                                | -              | -            | -                    | -                  | -                      | 2  | ILO        | TEST (-)              | TEST (-)                   |                     |
| 17             | 6 yr/M                | -                                                                                       | -                                            | -            | -           | Mild/ left upper and lower limb                      | -               | -                             | -                         | -                                | -              | -            | -                    | -                  | -                      | 2  | ILO        | TEST (-)              | TEST (-)                   |                     |
| 18             | 2 yr/M                | -                                                                                       | -                                            | -            | -           | Mild/ left upper limb                                | -               | -                             | -                         | -                                | -              | -            | -                    | -                  | -                      | 2  | ILO        | TEST (-)              | TEST (-)                   |                     |
| 19             | 16 yr/M               | -                                                                                       | -                                            | -            | -           | Severe/ right upper and lower limb)                  | -               | -                             | -                         | -                                | -              | -            | -                    | -                  | -                      | 2  | ILO        | TEST (-)              | TEST (-)                   |                     |
| 20             | 6 mo/F                | -                                                                                       | -                                            | -            | -           | Severe/ right upper and lower limb                   | -               | -                             | -                         | -                                | -              | -            | -                    | -                  | -                      | 2  | ILO        | TEST (-)              | TEST (-)                   |                     |

|    |         |   |   |   |   |                                       |   |   |   |   |   |   |   |   |   |   |          |          |          |
|----|---------|---|---|---|---|---------------------------------------|---|---|---|---|---|---|---|---|---|---|----------|----------|----------|
| 21 | 6 mo /M | - | - | - | - | Severe/ right upper and lower limb    | - | - | - | + | - | - | - | - | - | 3 | ILO      | TEST (-) | TEST (-) |
| 22 | 4 yr/M  | - | - | - | - | Mild/ right lower Limb                | - | - | - | - | - | - | - | - | - | 2 | ILO      | TEST (-) | TEST (-) |
| 23 | 9 mo/F  | - | - | - | - | Mild/ right upper and lower limb      | - | - | + | - | - | - | - | - | - | 3 | ILO      | TEST (-) | TEST (-) |
| 24 | 9 mo/F  | - | - | + | - | Severe/ left face and left lower limb | - | - | + | - | - | - | + | - | - | 6 | Atypical | TEST (-) | TEST (-) |
| 25 | 3 yr/M  | - | - | - | - | Severe/ left upper and lower limb     | - | - | - | - | - | - | - | - | - | 2 | ILO      | TEST (-) | TEST (-) |
| 26 | 1 yr/M  | - | - | - | - | Mild/ left upper and lower limb       | - | - | - | - | - | - | - | - | - | 2 | ILO      | TEST (-) | TEST (-) |
| 27 | 4 mo/F  | - | - | - | - | Severe/ right lower limb              | - | - | - | - | + | - | - | - | - | 3 | ILO      | TEST (-) | TEST (-) |
| 28 | 1 mo/F  | - | - | - | - | Mild/ right upper and lower limb      | - | - | - | - | + | - | - | - | - | 3 | ILO      | TEST (-) | TEST (-) |
| 29 | 3 yr/M  | - | - | - | - | Mild/ right lower limb                | - | - | - | - | - | - | - | - | - | 2 | ILO      | TEST (-) | TEST (-) |
| 30 | 5 mo/M  | - | - | - | - | Mild/ right upper and lower limb      | - | - | - | - | - | - | + | - | - | 3 | ILO      | TEST (-) | TEST (-) |
| 31 | 8 yr/F  | - | - | - | - | Mild/ right lower limb                | - | + | - | - | - | - | - | - | - | 3 | ILO      | TEST (-) | TEST (-) |
| 32 | 7 yr/F  | - | - | - | - | Severe/ right upper and lower limb    | - | - | - | - | - | - | - | - | - | 2 | ILO      | TEST (-) | TEST (-) |
| 33 | 11 yr/M | - | - | - | - | Mild/ right upper and lower limb      | - | - | - | - | - | - | - | - | - | 2 | ILO      | TEST (-) | TEST (-) |
| 34 | 6 mo/F  | - | - | - | - | Mild/ right lower limb)               | - | - | - | - | - | - | - | - | - | 2 | ILO      | TEST (-) | TEST (-) |
| 35 | 4 yr/F  | - | - | - | - | Severe/ right upper and lower limb    | - | - | - | - | - | - | - | - | - | 2 | ILO      | TEST (-) | TEST (-) |
| 36 | 6 yr/M  | - | - | - | - | Mild/ right upper and lower limb      | - | - | - | - | - | - | - | - | - | 2 | ILO      | TEST (-) | TEST (-) |
| 37 | 3 yr/M  | - | - | - | - | Mild/ right lower limb                | - | - | - | - | - | - | - | - | - | 2 | ILO      | TEST (-) | TEST (-) |
| 38 | 1 yr/F  | - | - | - | - | Mild/ right lower limb                | - | - | - | - | - | + | - | - | - | 3 | ILO      | TEST (-) | TEST (-) |
| 39 | 1 yr/F  | - | - | - | - | Mild/ right upper limb                | - | - | - | - | - | - | - | - | - | 2 | ILO      | TEST (-) | TEST (-) |
| 40 | 2 yr/M  | - | - | - | - | Mild/ right lower limb                | - | - | - | - | - | - | - | - | - | 2 | ILO      | TEST (-) | TEST (-) |
| 41 | 2 yr/F  | - | - | - | - | Mild/ left upper and lower limb       | - | - | - | + | - | - | - | - | - | 3 | ILO      | TEST (-) | TEST (-) |
| 42 | 6 mo/F  | - | - | - | - | Mild/ right lower limb                | - | - | - | - | - | - | + | - | - | 3 | ILO      | TEST (-) | TEST (-) |
| 43 | 2 yr/F  | - | - | - | - | Severe/ right lower limb              | - | - | - | - | - | - | - | - | - | 2 | ILO      | TEST (-) | TEST (-) |
| 44 | 3 yr /F | - | - | - | - | Severe/ right lower limb              | - | - | - | - | - | - | - | - | - | 2 | ILO      | TEST (-) | TEST (-) |
| 45 | 11 yr/F | - | - | - | - | Mild/ sol lower limb                  | - | - | - | - | - | - | - | - | - | 2 | ILO      | TEST (-) | TEST (-) |
| 46 | 2 yr /M | - | - | - | - | Severe/ right lower limb              | - | - | - | - | - | - | - | - | - | 2 | ILO      | TEST (-) | -        |
| 47 | 5 mo/M  | - | - | - | - | Mild/ right upper and lower limb      | - | - | - | - | - | - | - | - | - | 2 | ILO      | TEST (-) | -        |
| 48 | 2 yr/M  | - | - | - | - | Severe/ right upper and lower limb    | - | - | - | - | - | - | - | - | - | 2 | ILO      | TEST (-) | -        |

|    |           |   |   |   |   |                                    |   |   |   |   |   |   |   |   |   |   |           |          |          |
|----|-----------|---|---|---|---|------------------------------------|---|---|---|---|---|---|---|---|---|---|-----------|----------|----------|
| 49 | 1 yr /F   | - | - | - | - | Mild/ left upper and lower limb    | - | - | - | - | - | - | - | - | + | 3 | ILO       | TEST (-) | -        |
| 50 | 3 yr /F   | - | - | - | - | Severe/ right upper and lower limb | - | - | - | - | - | - | - | - | - | 2 | ILO       | TEST (-) | TEST (-) |
| 51 | 8 mo/F    | - | - | - | - | Mild/ right upper and lower limb   | - | - | - | - | - | - | - | - | - | 2 | ILO       | TEST (-) | -        |
| 52 | 6 yr /F   | - | - | - | - | Mild/Contralateral                 | - | - | - | - | - | - | - | - | - | 2 | ILO       | TEST (-) | TEST (-) |
| 53 | 10 yr/F   | - | - | - | - | Severe/Contralateral               | - | - | - | - | - | - | - | - | - | 2 | ILO       | TEST (-) | TEST (-) |
| 54 | 4 yr/F    | - | - | - | - | Mild/Right lower limb              | - | - | - | - | - | - | - | - | - | 2 | ILO       | TEST (-) | TEST (-) |
| 55 | 10 yr/F   | - | - | + | - | Mild/left lower limb               | - | - | - | + | - | - | - | - | - | 5 | Atypical  | TEST (-) | -        |
| 56 | 2 yr/F    | - | - | - | - | Mild/ left upper and lower limb    | - | - | - | - | - | + | - | - | - | 3 | ILO       | TEST (-) | -        |
| 57 | 9 yr/F    | - | - | - | - | Mild/ left lower limb              | - | - | - | - | - | - | - | - | - | 2 | ILO       | TEST (-) | -        |
| 58 | 4 yr/M    | - | - | - | - | Mild/ right lower limb             | - | - | - | - | - | - | - | - | - | 2 | ILO       | TEST (-) | -        |
| 59 | 1 yr/M    | - | - | - | - | Severe/ right lower limb           | - | - | - | + | - | + | - | - | + | 5 | Atypical  | TEST (-) | -        |
| 60 | 7 mo/M    | - | - | - | - | Mild/right upper and lower limb    | - | - | - | - | - | - | - | - | - | 2 | ILO       | TEST (-) | TEST (-) |
| 61 | 8 yr/F    | - | - | + | - | Severe/ left upper and lower limb  | - | - | - | - | - | - | - | - | - | 4 | Atypical  | TEST (-) | -        |
| 62 | 7 mo/M    | - | - | - | - | Mild/ right upper and lower limb   | - | - | - | - | - | - | - | - | - | 2 | ILO       | TEST (-) | -        |
| 63 | 2 mo/M    | - | - | - | - | Mild/ left upper limb              | - | - | - | - | + | - | - | - | - | 3 | ILO       | TEST (-) | -        |
| 64 | 2 mo/M    | - | - | + | - | Mild/ left upper and lower limb    | - | - | - | - | + | - | - | - | - | 5 | Atypical  | IC2-LoM  | -        |
| 65 | 38/days/M | - | - | + | - | Mild/ left upper and lower limb    | - | - | + | + | - | + | - | - | - | 7 | Classical | pUPD11   | -        |
| 66 | 7 yr/M    | - | - | + | - | Mild/ left lower limb              | - | - | - | - | + | - | - | + | - | 6 | Classical | IC2-LoM  | -        |
| 67 | 15 mo/M   | - | - | + | - | Mild/ right upper and lower limb   | - | - | - | - | - | - | - | - | + | 5 | Atypical  | IC2-LoM  | -        |
| 68 | 17 days/M | - | - | + | - | Mild/ right upper and lower limb   | - | - | - | - | - | - | + | - | - | 5 | Atypical  | IC2-LoM  | -        |
| 69 | 2 yr/F    | - | - | + | - | Severe/ left upper and lower limb  | - | - | - | + | - | - | - | - | - | 5 | Atypical  | pUPD11   | -        |
| 70 | 5 mo/F    | - | - | + | - | Severe/right upper and lower limb  | - | - | - | - | - | - | - | - | + | 5 | Atypical  | IC2-LoM  | -        |
| 71 | 2 mo/M    | - | - | + | + | Severe/right upper and lower limb  | - | - | - | + | - | - | - | - | + | 8 | Classical | IC2-LoM  | -        |
| 72 | 3 mo/F    | - | - | - | - | Mild/right upper and lower limb    | - | - | - | - | + | - | - | - | + | 4 | Atypical  | pUPD11   | -        |
| 73 | 4mo/M     | - | - | + | - | Mild/right lower limb              | - | + | - | - | + | - | - | - | - | 7 | Classical | pUPD11   | -        |
| 74 | 7 mo/M    | - | - | + | - | Mild/right upper and lower limb    | - | + | - | - | + | + | - | - | - | 7 | Classical | IC1-GoM  | -        |

|       |                 |   |   |    |   |                                         |   |   |   |    |    |    |   |   |    |   |               |          |   |
|-------|-----------------|---|---|----|---|-----------------------------------------|---|---|---|----|----|----|---|---|----|---|---------------|----------|---|
| 75    | 8 mo/<br>M      | - | - | +  | - | Mild/left<br>upper and<br>lower limb    | - | + | + | -  | -  | +  | - | - | -  | 7 | Class<br>ical | IC1-GoM  | - |
| 76    | 18 mo/<br>F     | - | - | +  | - | Mild/right<br>upper and<br>lower limb   | - | - | - | -  | -  | +  | - | - | -  | 5 | Atypi<br>cal  | IC2-LoM  | - |
| 77    | 4,5<br>mo/<br>F | - | - | +  | + | Severe/right<br>upper and<br>lower limb | - | - | - |    | +  | -  | - | - | -  | 7 | Class<br>ical | IC2-LoM  | - |
| 78    | 18 mo/<br>F     | - | - | +  | - | Mild/left<br>upper and<br>lower limb    | - | - | - | +  | +  | -  | - | - | -  | 6 | Class<br>ical | IC2-LoM  | - |
| 79    | 13 mo/<br>M     | - | - | +  | + | Mild/left<br>lower limb                 | - | - | - | -  | +  | -  | - | - | -  | 7 | Class<br>ical | IC2-LoM  | - |
| 80    | 10 mo/<br>M     | - | - | -  | - | Severe/right<br>lower limb              | - | + | + | -  | +  | +  |   | - | +  | 6 | Atypi<br>cal  | pUPD11   | - |
| 81    | 7mo/<br>M       | - | - | +  | - | Severe/right<br>lower limb              | - | - | + | -  | -  | -  | - | - | -  | 7 | Atypi<br>cal  | pUPD11   | - |
| 82    | 4yr/F           | - | - | +  | + | Mild/right<br>upper and<br>lower limb   | - | - | - | -  | +  | -  | - | - | +  | 8 | Class<br>ical | IC2-LoM  | - |
| 83    | 2 yr/M          | - | - | +  | + | Severe/right<br>lower limb              | - | - | + | -  | -  | -  | - | - | +  | 6 | Class<br>ical | IC2-LoM  | - |
| 84    | 4<br>mo/M       | - | - | +  | - | Severe/right<br>upper and<br>lower limb | + | - | - | +  | -  | +  | - | - | -  | 8 | Atypi<br>cal  | pUPD11   | - |
| 85    | 11mo/<br>M)     | - | - | +  | + | Severe/right<br>upper and<br>lower limb | - | - | - | -  | -  | +  | - | - | +  | 8 | Class<br>ical | TEST (-) | - |
| 86    | 3 yr/M          | - | - | -  | - | Severe/right<br>lower limb              | - | + | - | -  | -  | -  | - | - | -  | 3 | ILO           | TEST (-) | - |
| 87    | 1 yr/M          | - | + | -  | - | Mild/right<br>upper and<br>lower limb   | - | - | - | -  | -  | -  | - | - | -  | 4 | Atypi<br>cal  | TEST (-) | - |
| Total |                 | 0 | 1 | 26 | 7 | 87                                      | 1 | 6 | 9 | 14 | 17 | 13 | 8 | 1 | 11 |   |               |          |   |

Abbreviations: M, Male; F, Female; mo, month; yr, year; B, Bening; WT: Wilms tumor; ILO: Isolated lateralized overgrowth; IC1-GoM, Imprinting Center 1 gain of methylation; ICR2-LoM, Imprinting Center 2 loss of methylation; pUPD11, Paternal uniparental disomy of chromosome 11. MS-MLPA: Methylation-specific multiplex ligation-dependent probe amplification
